# Supplementary material for: Characterization of the Effect of N-(2-Methoxyphenyl)-1-methyl-1H-benzimidazol-2-amine, Compound 8, against Leishmania mexicana and Its In Vivo Leishmanicidal Activity
Source: MDPI journal article supplement (doi:10.3390/ijms25010659), 2024-01-04
Supplement: s1 [file s1]

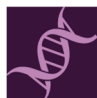

Supplementary Material

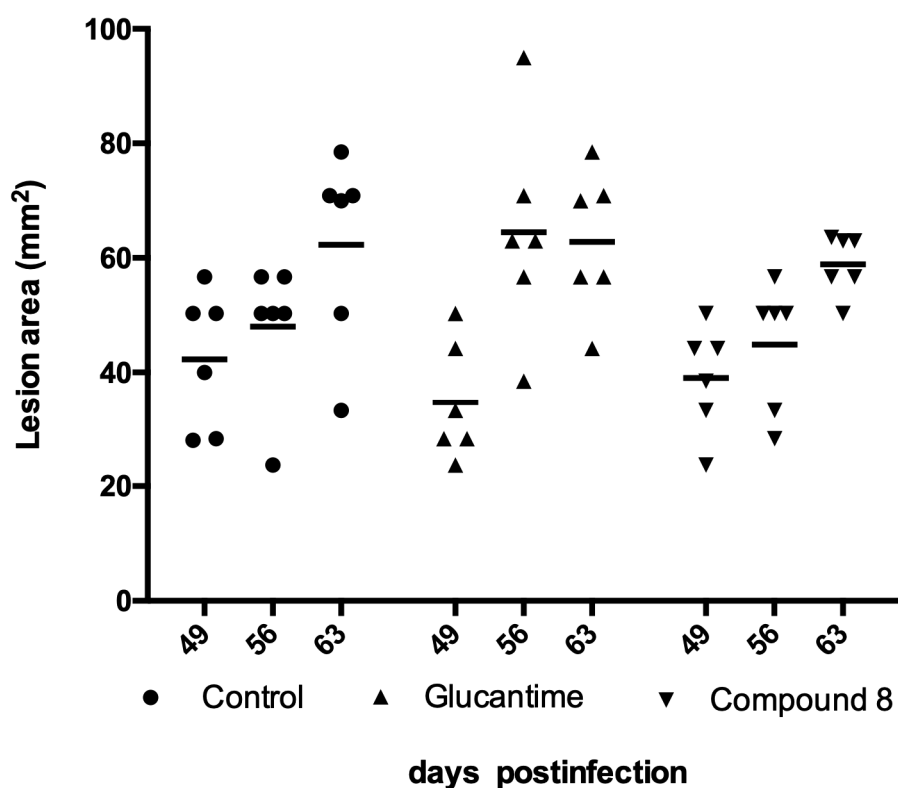

**Figure S1.** Lesion size localized in the footpads of non-treated and treated mice infected with *L. mexicana*. The lesion area of non-treated infected mice (•) and infected mice treated with compound 8 (▼) and Glucantime (▲) were measured at day 49 post infection, when the drugs administration was initiated to day 63 when footpads were removed.
